# Supplementary material for: annoFuse: an R Package to annotate, prioritize, and interactively explore putative oncogenic RNA fusions
Source: PubMed Central journal article supplement (PMC7737294; doi:10.1186/s12859-020-03922-7), 2020-12-14
Supplement: 12859_2020_3922_MOESM1_ESM.pdf [file 12859_2020_3922_MOESM1_ESM.pdf]

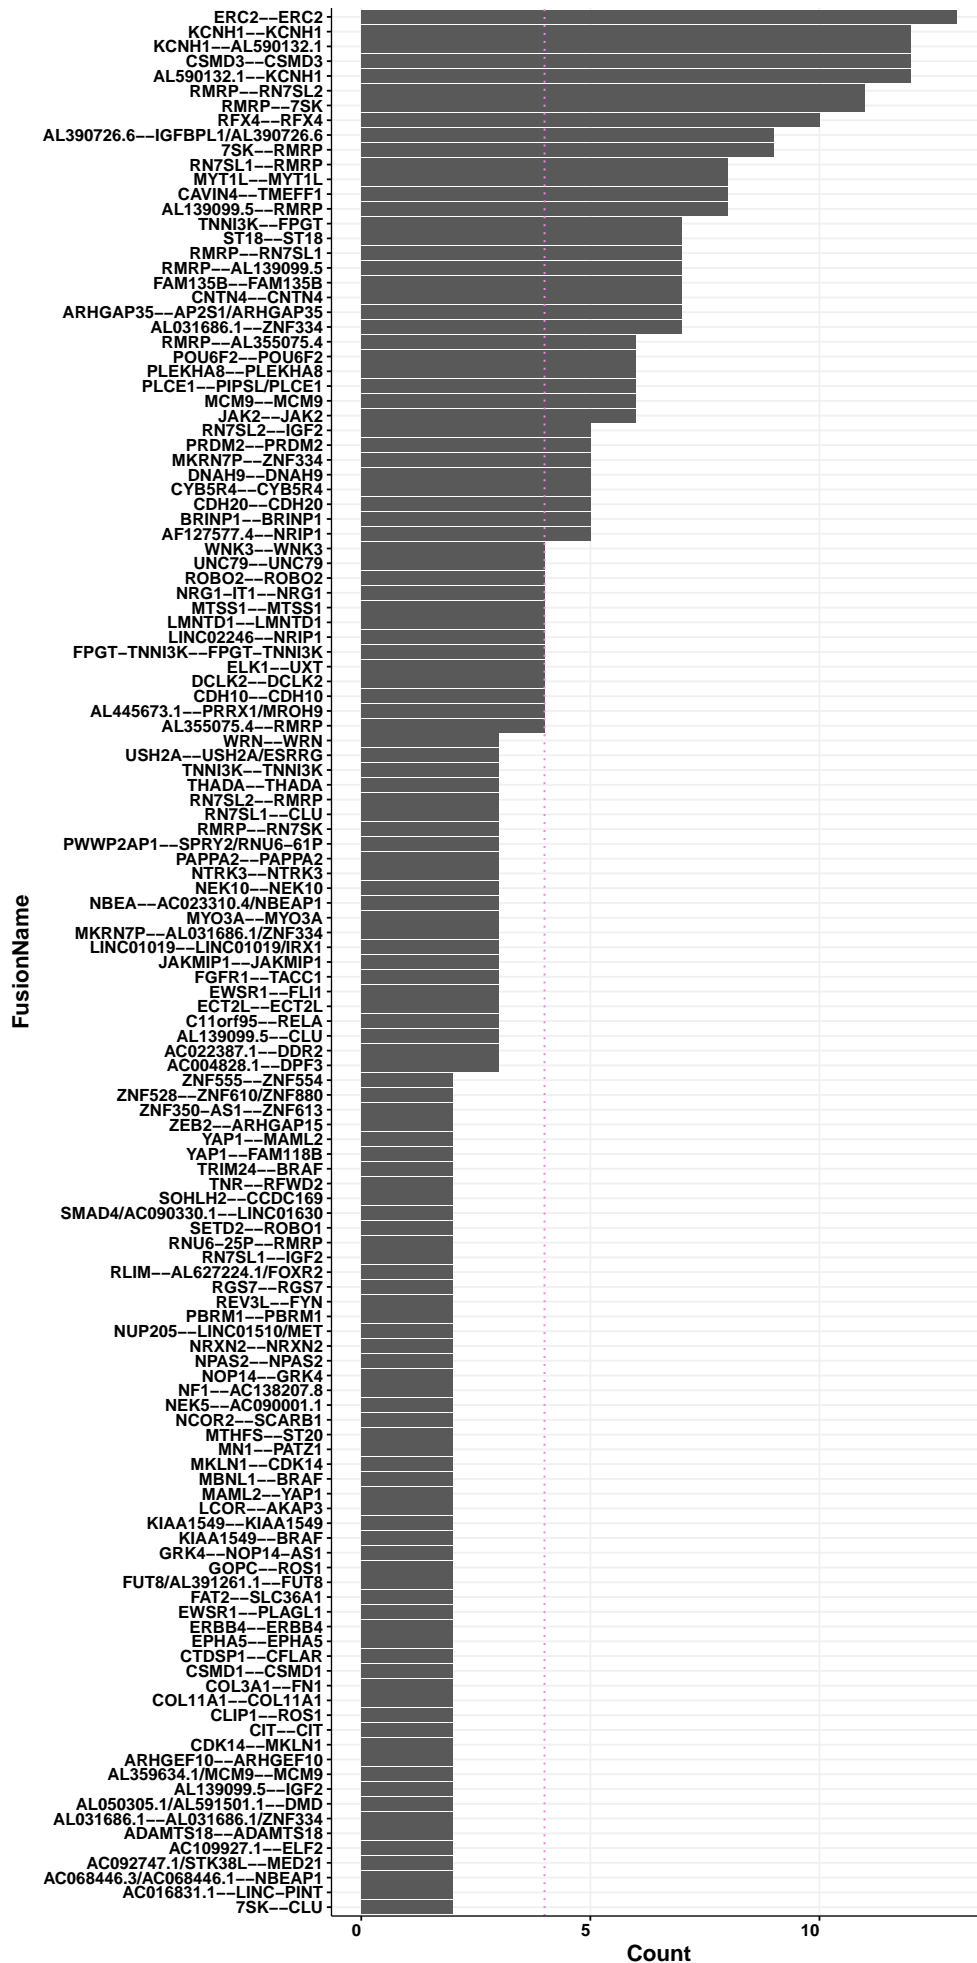

Figure S1: Fusions found in more than 1 histology

**A**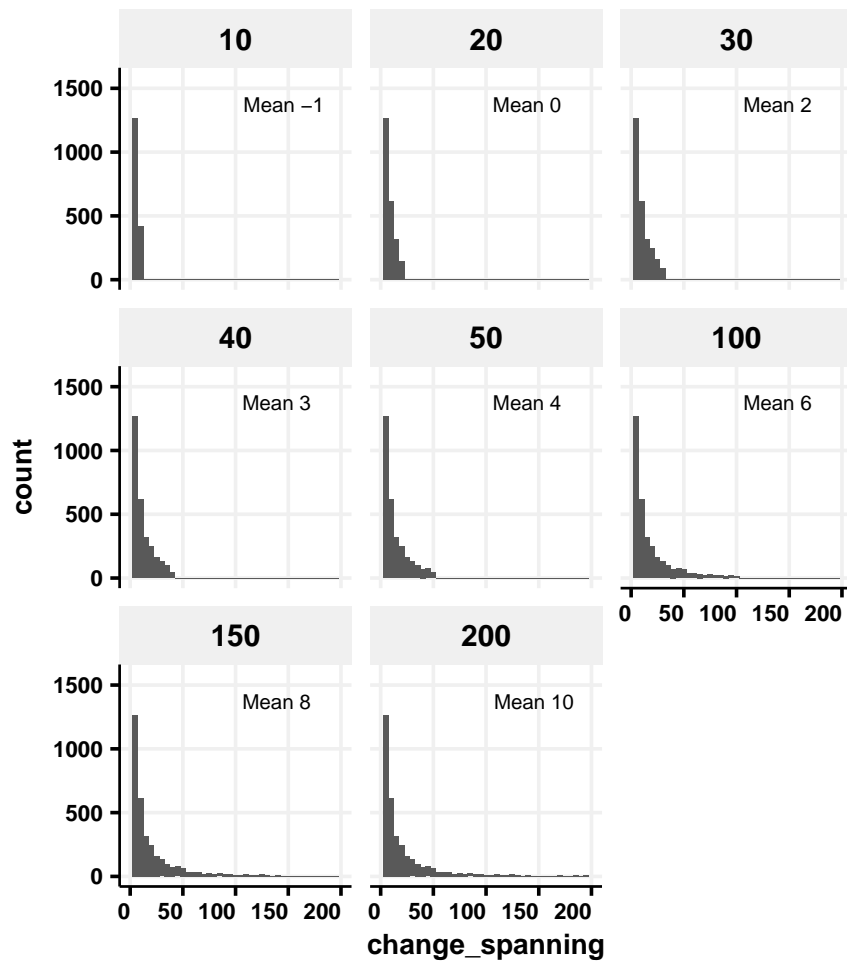**B**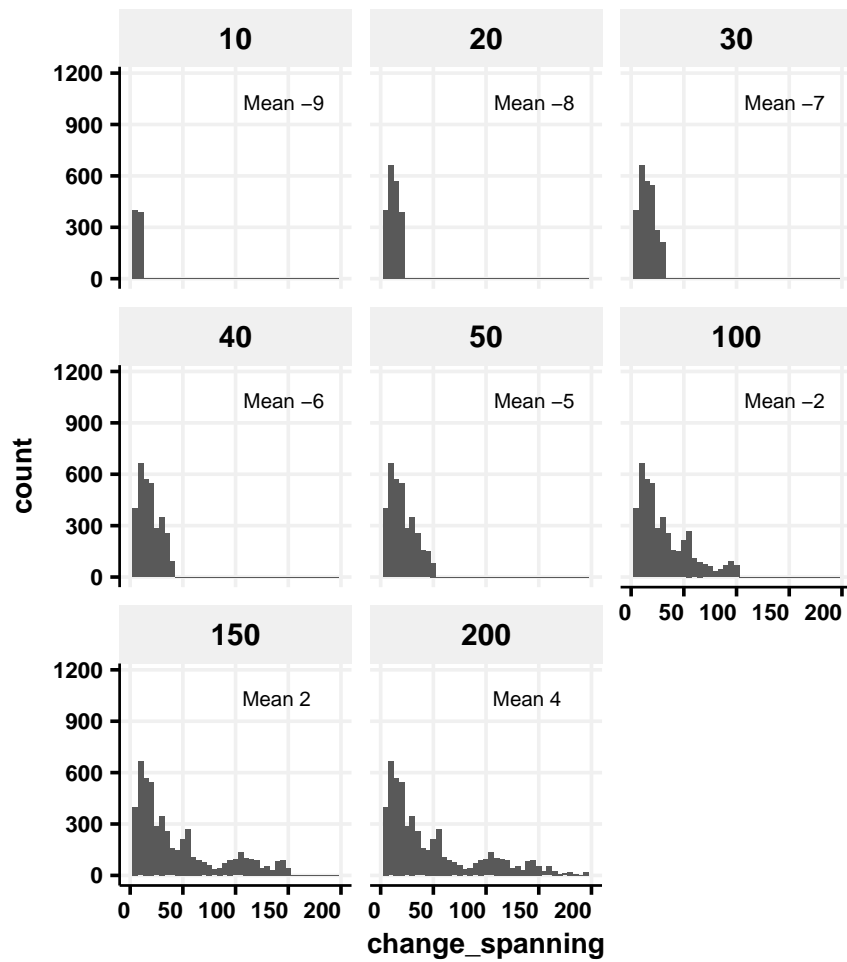

Figure S2: Distribution of spanningDelta for annoFuse prioritized fusions from TCGA and PBTA cohorts

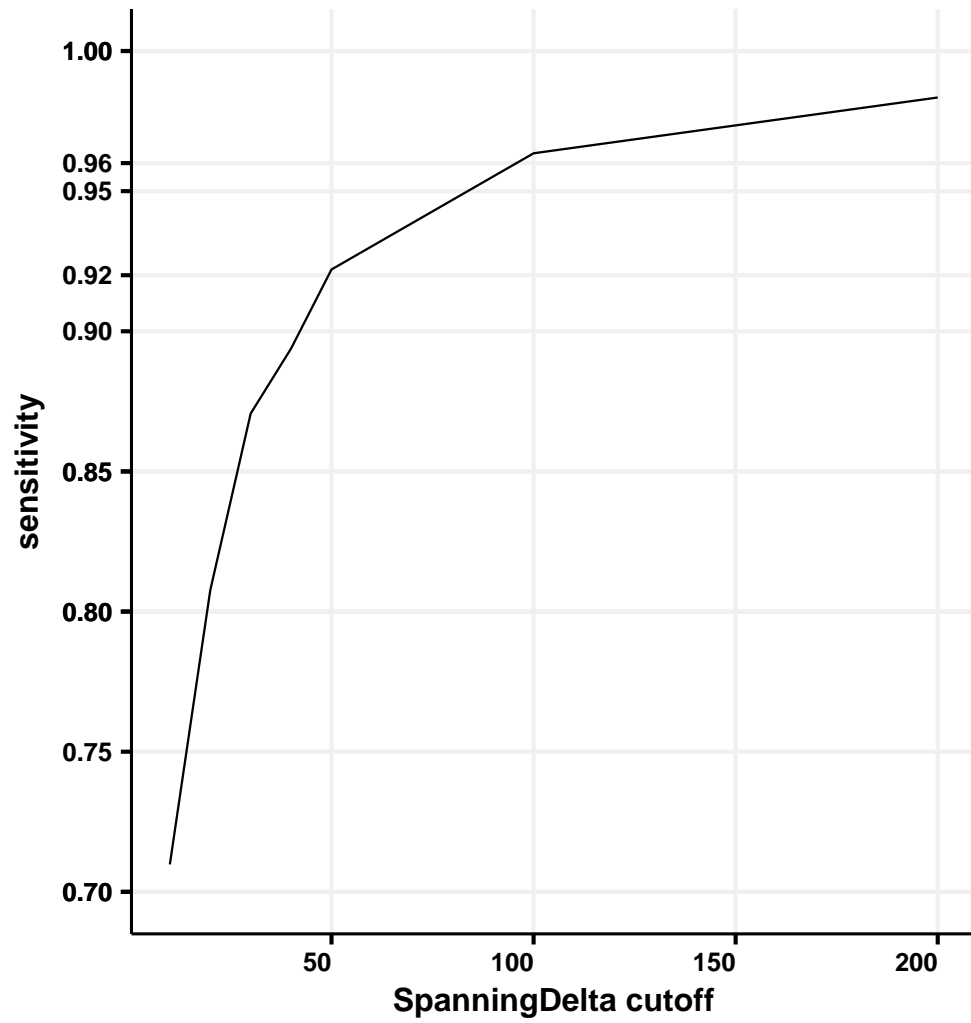

Figure S3: Sensitivity of TCGA fusions retained by annoFuse

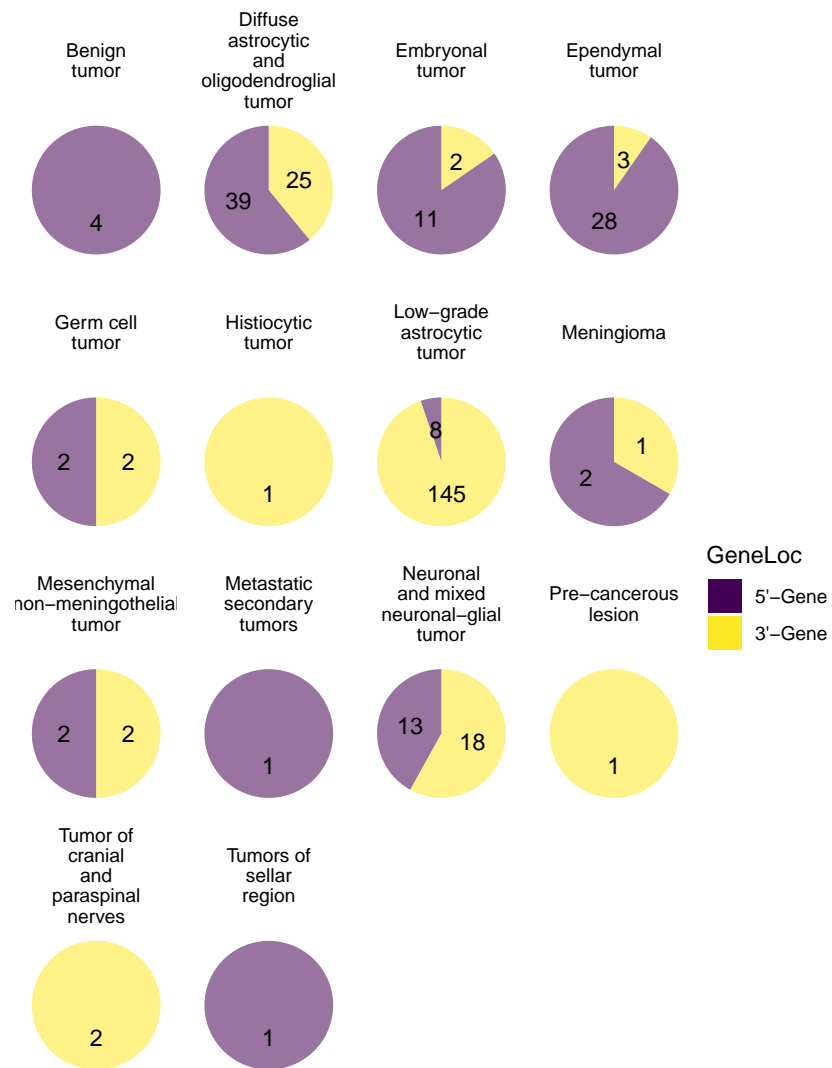

**Figure S4:** Distribution of kinase genes fused in 5' and 3' genes per histologies
